# Supplementary material for: Dezincification of brass water meters in a long-term study: effects of anions, alkalinity, and residual chlorine
Source: Royal Society of Chemistry journal article supplement (doi:10.1039/d1ew00351h), 2021-01-01
Supplement: d1ew00351h1.pdf [file d1ew00351h1.pdf]

1 **SUPPORTING INFORMATION**

2 **Dezincification of Brass Water Meters in a Long-term Study: Effects of Anions,**  
3 **Alkalinity, and Residual Chlorine in Tap Water**

4 Shu-Ju Chao<sup>a</sup>, Ming-Han Tsai<sup>a</sup>, Rui-Pei Yu<sup>a</sup>, Lap-Cuong Hua<sup>a</sup>, Chi-Chang. Hu<sup>b</sup>, Chihpin Huang<sup>a,\*</sup>

5 <sup>a</sup>: Institute of Environmental Engineering, National Yang Ming Chiao Tung University, Hsinchu 300, Taiwan.

6 <sup>b</sup>: Department of Chemical Engineering, National Tsing Hua University, Hsinchu 300, Taiwan

7 \*: correspondence author: Chihpin Huang, [huang@nctu.edu.tw](mailto:huang@nctu.edu.tw)

8

9

10

**Table S1** Characteristics of Hsinchu tap water

| Water quality        | Value     |
|----------------------|-----------|
| pH                   | 7.93±0.19 |
| Free chlorine (mg/L) | 0.16±0.15 |
| Conductivity (µS/cm) | 300±29    |
| Turbidity (NTU)      | 0.23±1.0  |
| Hardness (mg/L)      | 122±17    |
| Alkalinity (mg/L)    | 120±19    |
| Sulphate (mg/L)      | 46.9±9    |
| Chloride (mg/L)      | 11.3±4.1  |

11

12 **Text S1**

13 **Table S2** shows the change of water qualities for various synthetic waters. In the high Alk  
14 groups ( $A_{High}B_{High}C_{Low}$  and  $A_{High}B_{High}C_{High}$ ), average Alk slightly decreased from 230 to 191 mg/L  
15 after 7-day exposure of tested water and water meter. By contrast, an insignificant change (< 10%)  
16 was observed in the low Alk groups as well as the control group. For low RC groups  
17 ( $A_{High}B_{High}C_{Low}$  and  $A_{High}B_{Low}C_{Low}$ ), DO decreased from 8.64±0.2 to 7.06±0.6 mg/L, while it  
18 decreased from 8.91±0.2 to 7.94±0.1 mg/L in the high RC groups ( $A_{High}B_{High}C_{High}$  and  
19  $A_{High}B_{Low}C_{High}$ ). On the contrary, low RC slightly reduced the ORP ( $\Delta ORP$ : 150±84 mV) which  
20 is much lower than that in the high RC condition ( $\Delta ORP$ : 409.0±4.9 mV). An overall increase in

21 pH from around 8.09 to around 8.25 was found in all tested groups after 7-day exposure. This was  
22 likely attributed to the oxygen reduction reaction (ORR,  $O_2 + 2H_2O + 4e^- \rightarrow 4OH^-$ ). The pH ~8.2  
23 on the 7<sup>th</sup> day occurred in all tested groups might indicate a favorable pH condition for  
24 dezincification, as reported by Mahdy *et al.* (2013).

**Table S2** Change of water qualities for various synthetic waters

|                                                         | Day             | Alkalinity<br>(mg/L as CaCO <sub>3</sub> ) | DO<br>(mg/L) | ORP<br>(mV) | pH       | Conductivity<br>(μS/cm) | Chlorine<br>(mg/L as Cl <sub>2</sub> ) | Sulfate<br>(mg/L) | Chloride<br>(mg/L) |
|---------------------------------------------------------|-----------------|--------------------------------------------|--------------|-------------|----------|-------------------------|----------------------------------------|-------------------|--------------------|
| <b>A<sub>Low</sub>B<sub>Low</sub>C<sub>Low</sub></b>    | 1 <sup>st</sup> | 129±23                                     | 8.85±1.0     | 466±181     | 8.09±0.1 | 316±114                 | 0.49±0.6                               | 62±7              | 6.42±1.2           |
|                                                         | 7 <sup>th</sup> | 120±10                                     | 7.46±1.0     | 262±3       | 8.20±0.2 | 286±5                   | 0.04±0.1                               | 64±12             | 6.25±0.4           |
| <b>A<sub>High</sub>B<sub>High</sub>C<sub>Low</sub></b>  | 1 <sup>st</sup> | 229±28                                     | 8.36±1.6     | 343±122     | 8.07±0.1 | 639±84                  | 0.31±0.2                               | 115±11            | 66.93±2.6          |
|                                                         | 7 <sup>th</sup> | 188±27                                     | 6.42±1.8     | 253±11      | 8.26±0.2 | 623±56                  | 0.05±0.1                               | 84±57             | 59.95±6.2          |
| <b>A<sub>High</sub>B<sub>High</sub>C<sub>High</sub></b> | 1 <sup>st</sup> | 230±21                                     | 9.09±0.4     | 638±55      | 8.08±0.2 | 631±140                 | 1.01±1.1                               | 116±1.2           | 59.25±3.1          |
|                                                         | 7 <sup>th</sup> | 194±28                                     | 8.01±0.8     | 232±17      | 8.25±0.3 | 637±44                  | 0.29±0.2                               | 127±7.4           | 61.99±2.2          |
| <b>A<sub>High</sub>B<sub>Low</sub>C<sub>Low</sub></b>   | 1 <sup>st</sup> | 120±12                                     | 8.71±1.1     | 443±103     | 8.09±0.1 | 530±23                  | 0.24±0.1                               | 115±14            | 52.29±3.5          |
|                                                         | 7 <sup>th</sup> | 114±9.4                                    | 7.29±1.1     | 233±17      | 8.18±0.2 | 526±23                  | 0.04±0.1                               | 126±10            | 56.99±9.0          |
| <b>A<sub>High</sub>B<sub>Low</sub>C<sub>High</sub></b>  | 1 <sup>st</sup> | 120±0.0                                    | 8.74±1.2     | 640±41      | 8.11±0.1 | 558±68                  | 1.00±1.3                               | 125±7.3           | 59.52±2.8          |
|                                                         | 7 <sup>th</sup> | 120±7.1                                    | 7.87±1.2     | 227±16      | 8.21±0.2 | 536±44                  | 0.18±0.1                               | 122±9.2           | 55.58±4.8          |

Errors indicate the replicate of over 90 measurements

High concentration: <sub>High</sub>, Low concentration: <sub>Low</sub>

Anions: A; Alkalinity (bicarbonate): B, Residual chlorine: C

Dissolved oxygen: DO, oxidation reduction potential: ORP

**Table S3** Leaching rate of Zn and Cu of brass water meters under various mixed parameters water quality

| Mixed water parameters                                  | Day 0-30<br>(mg/L day) |              | Day 31-240<br>(mg/L day) |              | Day 240-360<br>(mg/L day) |              |
|---------------------------------------------------------|------------------------|--------------|--------------------------|--------------|---------------------------|--------------|
|                                                         | Zn                     | Cu           | Zn                       | Cu           | Zn                        | Cu           |
| <b>A<sub>Low</sub>B<sub>Low</sub>C<sub>Low</sub></b>    | 0.550 (0.97)           | 0.073 (0.96) | 0.310 (0.96)             | 0.027 (0.95) | 0.330 (0.68)              | 0.004 (0.94) |
| <b>A<sub>High</sub>B<sub>High</sub>C<sub>Low</sub></b>  | 0.590 (0.93)           | 0.010 (0.90) | 0.380 (0.95)             | 0.007 (0.81) | 0.360 (0.72)              | 0.003 (0.97) |
| <b>A<sub>High</sub>B<sub>High</sub>C<sub>High</sub></b> | 0.590 (0.93)           | 0.070 (0.94) | 0.420 (0.98)             | 0.011 (0.89) | 0.360 (0.70)              | 0.004 (0.96) |
| <b>A<sub>High</sub>B<sub>Low</sub>C<sub>Low</sub></b>   | 0.720 (0.92)           | 0.010 (0.90) | 0.540 (0.99)             | 0.003 (0.87) | 0.390 (0.66)              | 0.003 (0.97) |
| <b>A<sub>High</sub>B<sub>Low</sub>C<sub>High</sub></b>  | 0.720 (0.92)           | 0.010 (0.90) | 0.590 (0.99)             | 0.005 (0.97) | 0.390 (0.70)              | 0.003 (0.98) |

Anions: A; Alkalinity (bicarbonate): B; Residual chlorine: C.

High concentration: <sub>High</sub>; Low concentration: <sub>Low</sub>.

$\Delta$  Concentration of Zinc or Copper

Leaching rate =  $\frac{\Delta \text{Concentration of Zinc or Copper}}{\Delta \text{Day}}$

The number in the blanket indicates the R<sup>2</sup> value

**Table S4** Quantified chemical composition of the scale formed by ICP-OES

| Testing groups                                          | Al         | K    | Ca   | Mn   | Fe   | Ni   | Cu   | Zn  | Pb   | Mg   |
|---------------------------------------------------------|------------|------|------|------|------|------|------|-----|------|------|
|                                                         | mg/g scale |      |      |      |      |      |      |     |      |      |
| <b>A<sub>Low</sub>B<sub>Low</sub>C<sub>Low</sub></b>    | 32.6       | 0.00 | 2.20 | 0.22 | 1.60 | 2.32 | 6.12 | 437 | 1.13 | 0.36 |
| <b>A<sub>High</sub>B<sub>High</sub>C<sub>Low</sub></b>  | 21.5       | 0.29 | 4.55 | 0.11 | 2.76 | 0.50 | 4.98 | 428 | 1.12 | 0.39 |
| <b>A<sub>High</sub>B<sub>High</sub>C<sub>High</sub></b> | 12.6       | 0.00 | 3.60 | 0.30 | 2.67 | 2.71 | 4.45 | 459 | 1.62 | 0.44 |
| <b>A<sub>High</sub>B<sub>Low</sub>C<sub>Low</sub></b>   | 18.6       | 0.19 | 2.05 | 0.11 | 6.99 | 1.66 | 3.11 | 485 | 1.94 | 0.44 |
| <b>A<sub>High</sub>B<sub>Low</sub>C<sub>High</sub></b>  | 19.7       | 0.30 | 2.41 | 0.13 | 3.93 | 1.68 | 2.99 | 477 | 1.31 | 0.91 |

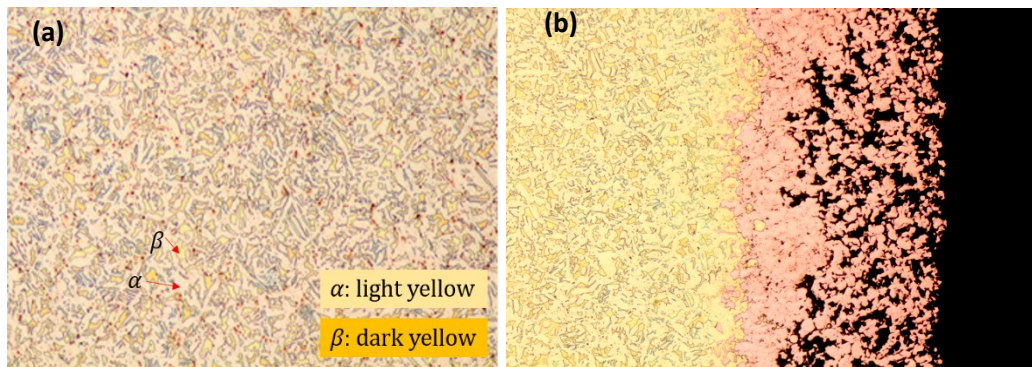

**Fig. S1** The OM images of brass water meters for (a) the metallographic structure and (b) the dezincification depth.

| Testing Groups             | Days |    |    |     |     |     |     |     |
|----------------------------|------|----|----|-----|-----|-----|-----|-----|
|                            | 18   | 32 | 66 | 104 | 192 | 250 | 299 | 376 |
| $A_{Low}B_{Low}C_{Low}$    |      |    |    |     |     |     |     |     |
| $A_{High}B_{High}C_{Low}$  |      |    |    |     |     |     |     |     |
| $A_{High}B_{High}C_{High}$ |      |    |    |     |     |     |     |     |
| $A_{High}B_{Low}C_{Low}$   |      |    |    |     |     |     |     |     |
| $A_{High}B_{Low}C_{High}$  |      |    |    |     |     |     |     |     |

**Fig. S2** Scale formation on the brass water meters in the water under various mixed parameters during the 376-day experiment.

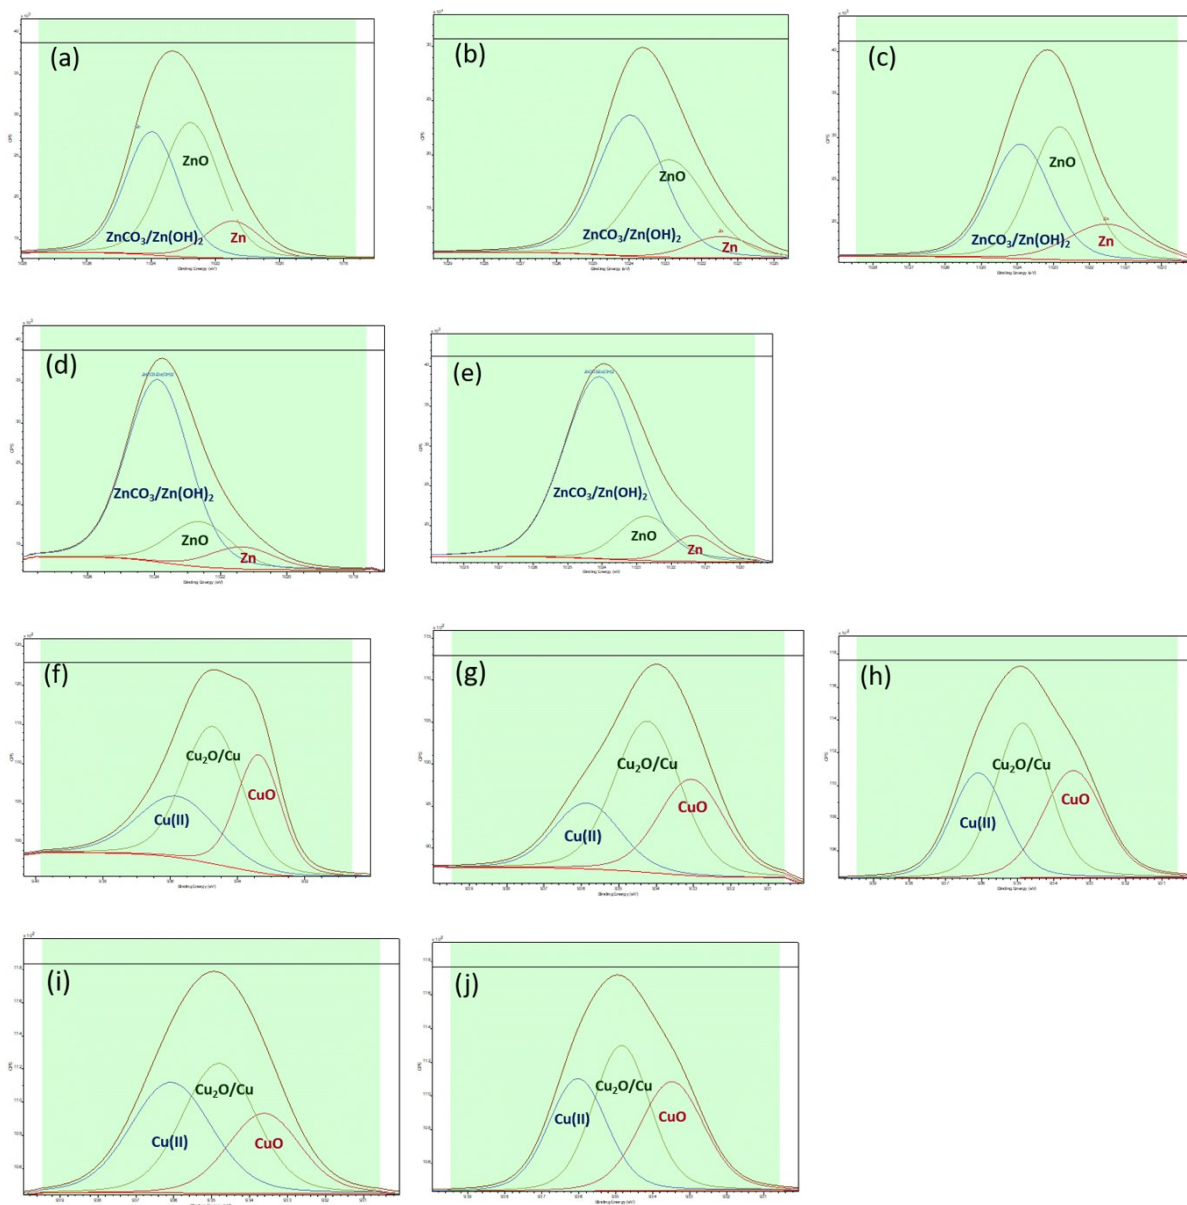

**Fig. S3** The XPS core-level spectra of (a-e) Zn 2p<sub>3/2</sub> and (f-j) Cu 2p<sub>3/2</sub> in the scale formed from water under various mixed parameters (a and f):  $A_{\text{Low}}B_{\text{Low}}C_{\text{Low}}$ , (b and g):  $A_{\text{High}}B_{\text{High}}C_{\text{Low}}$ , (c and h):  $A_{\text{High}}B_{\text{High}}C_{\text{High}}$ , (d and i):  $A_{\text{High}}B_{\text{Low}}C_{\text{Low}}$ , (e and j):  $A_{\text{High}}B_{\text{Low}}C_{\text{High}}$

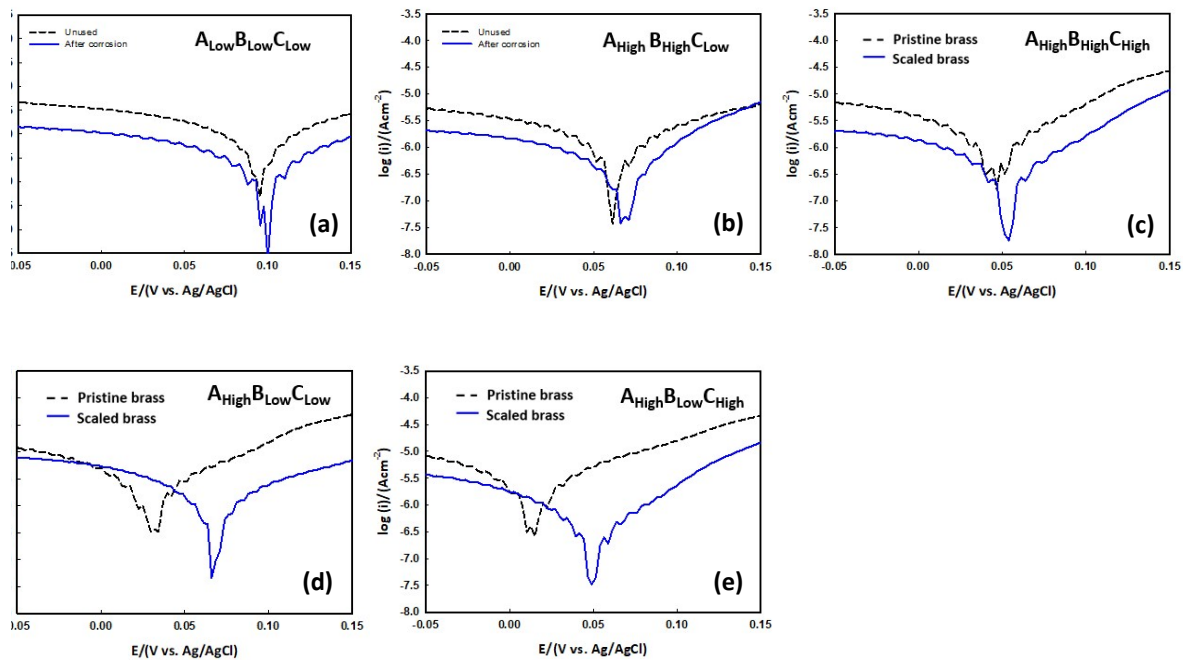

**Fig. S4** The positive shift in  $E_{\text{corr}}$  of the pristine and scaled brass chips in the water under various mixed parameters: (a)  $A_{\text{Low}}B_{\text{Low}}C_{\text{Low}}$  (b)  $A_{\text{High}}B_{\text{High}}C_{\text{Low}}$  (c)  $A_{\text{High}}B_{\text{High}}C_{\text{High}}$  (d)  $A_{\text{High}}B_{\text{Low}}C_{\text{Low}}$  (e)  $A_{\text{High}}B_{\text{Low}}C_{\text{High}}$ .
